# Supplementary material for: Methane paradox in tropical lakes? Sedimentary fluxes rather than pelagic production in oxic conditions sustain methanotrophy and emissions to the atmosphere
Source: Copernicus journal article supplement (doi:10.5194/bg-17-5209-2020), 2020-10-29
Supplement: Supplementary file 1 [file bg-17-5209-2020-supplement.pdf]

Supplement of Biogeosciences, 17, 5209–5221, 2020  
<https://doi.org/10.5194/bg-17-5209-2020-supplement>  
© Author(s) 2020. This work is distributed under  
the Creative Commons Attribution 4.0 License.

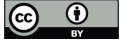

*Supplement of*

## **Methane paradox in tropical lakes? Sedimentary fluxes rather than pelagic production in oxic conditions sustain methanotrophy and emissions to the atmosphere**

**Cédric Morana et al.**

*Correspondence to:* Cédric Morana ([cedric.morana@kuleuven.be](mailto:cedric.morana@kuleuven.be))

The copyright of individual parts of the supplement might differ from the CC BY 4.0 License.

## Supplementary table and figures.

**Table S1. Summary of major limnological characteristics of the sampled lakes.** Numbers between brackets are the mean depth; numbers followed by an asterisk are the average value for two sampling cruises. Zm is the mixed layer depth and Ze is the euphotic zone depth.

| Lake         | Mixing regime | Surface area (km <sup>2</sup> ) | Max depth (m) | Zm (m) | Ze (m) | Chlorophyll <i>a</i> (mg m <sup>-3</sup> ) |
|--------------|---------------|---------------------------------|---------------|--------|--------|--------------------------------------------|
| Edward       | Monomictic    | 2300                            | 117 (34)      | 15*    | 7.7*   | 4.8*                                       |
| Kyamwanga    | Monomictic    | 2.6                             | 40            | 5      | 3.1    | 6.0                                        |
| Nyamusingere | Polymictic    | 3.84                            | 3             | 0.5    | 1.1    | 88.3                                       |
| Katinda      | Monomictic    | 0.44                            | 20            | 1*     | 1.2*   | 77.2*                                      |
| George       | Polymictic    | 250                             | 7 (3)         | 0.15*  | 1.1*   | 149.7*                                     |

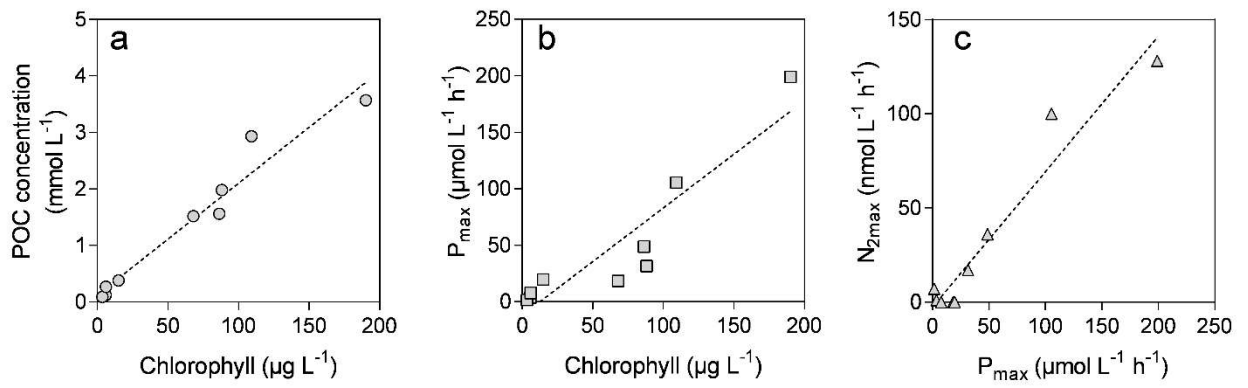

**Figure S1. Relationships between phytoplankton primary production and N<sub>2</sub> fixation.** Linear relationship between (a) the chlorophyll *a* (μg chla L<sup>-1</sup>) and particulate organic carbon (POC, mmol L<sup>-1</sup>) concentrations, (b) chlorophyll *a* and maximum photosynthetic activity (P<sub>max</sub>, mmol C L<sup>-1</sup> h<sup>-1</sup>), and (c) P<sub>max</sub> and the maximum N<sub>2</sub> fixation (N<sub>2max</sub>, nmol N<sub>2</sub> L<sup>-1</sup> h<sup>-1</sup>) rates.

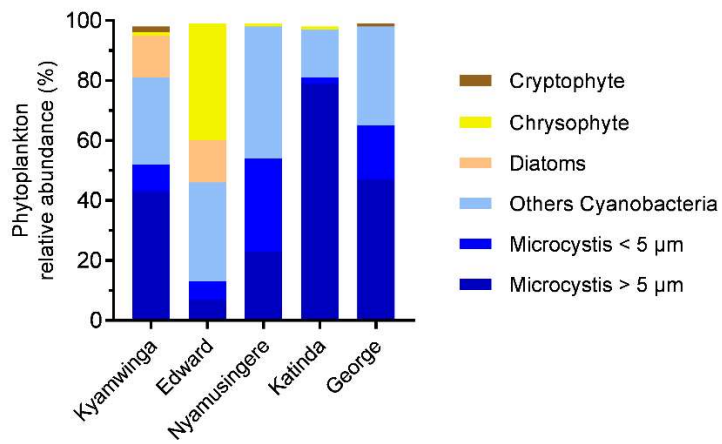

**Figure S2. Phytoplankton community composition.** Phytoplankton community composition in the surface waters the African lakes sampled.

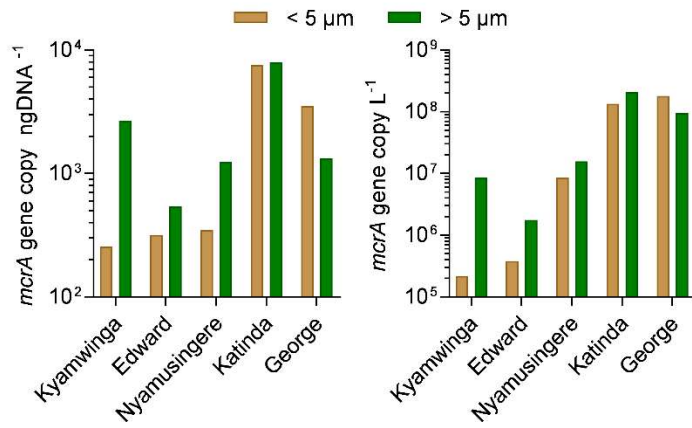

**Figure S3. *mcrA* gene abundance.** *mcrA* gene copy concentration (a) and *mcrA* gene copy abundance normalized on the DNA concentration (b) in each African lake sampled. Green and brown bars represent the > 5  $\mu\text{m}$  and < 5  $\mu\text{m}$  fraction of the seston, respectively.

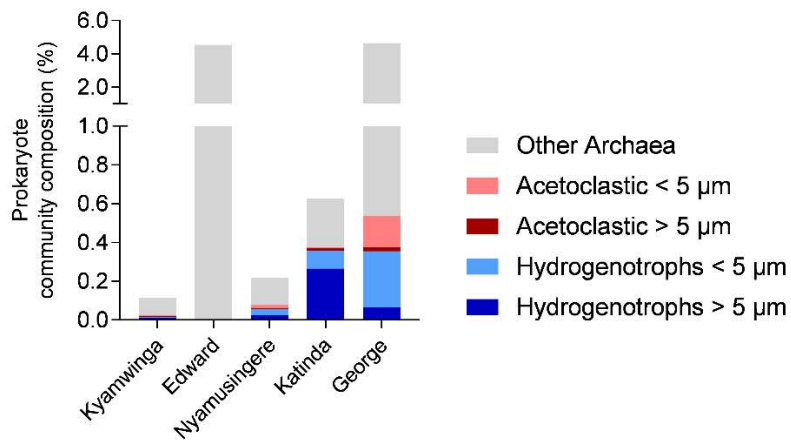

**Figure S4. Prokaryote community composition.** Contribution of methanogens to the prokaryote community composition in the African lake sampled.

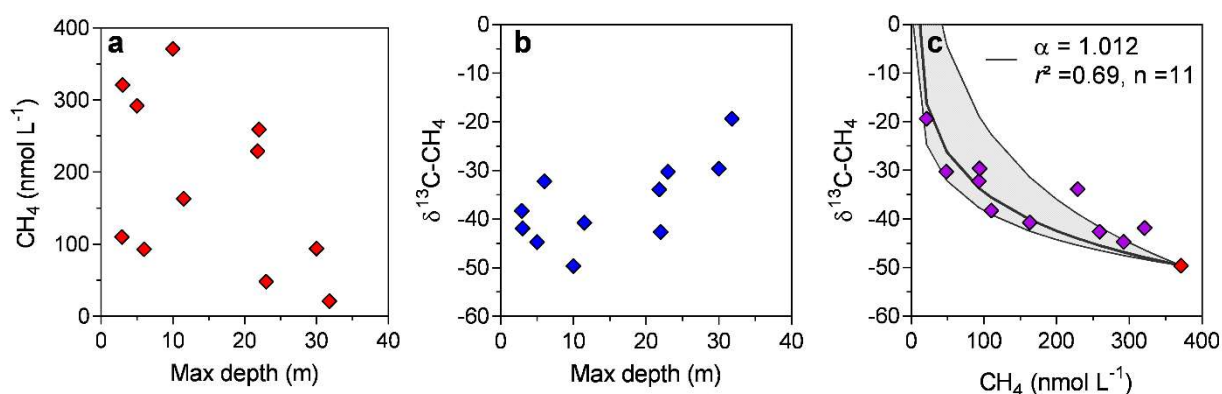

**Figure S5. Littoral pelagic - gradient in L. Edward.** Relationship between the maximum depth of the station and (a) the CH<sub>4</sub> concentration (nmol L<sup>-1</sup>) and (b) the stable carbon isotope composition of CH<sub>4</sub> ( $\delta^{13}\text{C-CH}_4$ , ‰) in surface waters (0.3 m), in L. Edward. Data were collected between 18/01/2018 and the 24/01/2018. (c) Relationship between the CH<sub>4</sub> concentration and the  $\delta^{13}\text{C-CH}_4$  in surface waters of L. Edward. The black curve represents the fitted ( $r^2$  0.69,  $n$  =11) apparent carbon isotope fractionation factor during CH<sub>4</sub> oxidation ( $\alpha$ ) calculated as in Morana et al. (2015). Grey zone represents the expected  $\delta^{13}\text{C-CH}_4$  at a given concentration considering a range of  $\alpha$  value comprised between 1.009 and 1.023 and a littoral (2.5 m max depth) surface water  $\delta^{13}\text{C-CH}_4$  source of -43.6‰ (red symbol). The apparent C isotope fractionation ( $\alpha$  = 1.012) in L. Edward surface waters was close to the isotope fractionation factor previously determined experimentally for CH<sub>4</sub> oxidation in L. Kivu ( $\alpha$  = 1.016), another large East African lake (Morana et al. 2015).

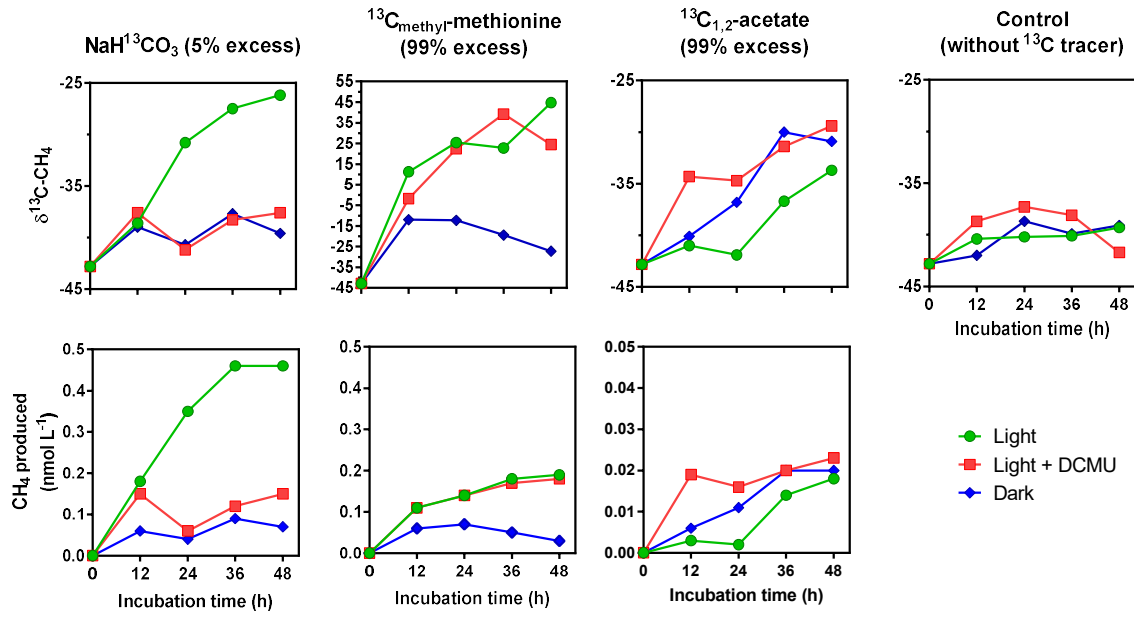

**Figure S6.  $^{13}\text{C}$  labelling experiment kinetics.** Upper panel: In well-oxygenated surface waters of Lake Edward, evolution of the  $\delta^{13}\text{C}\text{-CH}_4$  during the incubation in bottles amended with 1 ml of  $\text{NaH}^{13}\text{CO}_3$  (leftmost),  $^{13}\text{C}_{\text{methyl-methionine}}$ ,  $^{13}\text{C}_{(1,2)\text{-acetate}}$ , or water (control treatment, rightmost). Note the difference in the amount of excess  $^{13}\text{C}$  between the  $\text{NaH}^{13}\text{CO}_3$  and the  $^{13}\text{C}_{\text{methyl-methionine}}$  and  $^{13}\text{C}_{(1,2)\text{-acetate}}$  treatment. Bottom panel: Amount of  $\text{CH}_4$  produced from the corresponding  $^{13}\text{C}$ -tracer calculated at each time step as described in the material & methods section. Green, grey and black symbols represent bottles incubated under light, light and DCMU, and darkness, respectively.  $\text{CH}_4$  concentration &  $^{13}\text{C}$  kinetics showed similar patterns in L. George, L. Katinda and L. Nyamusingere (not showed).



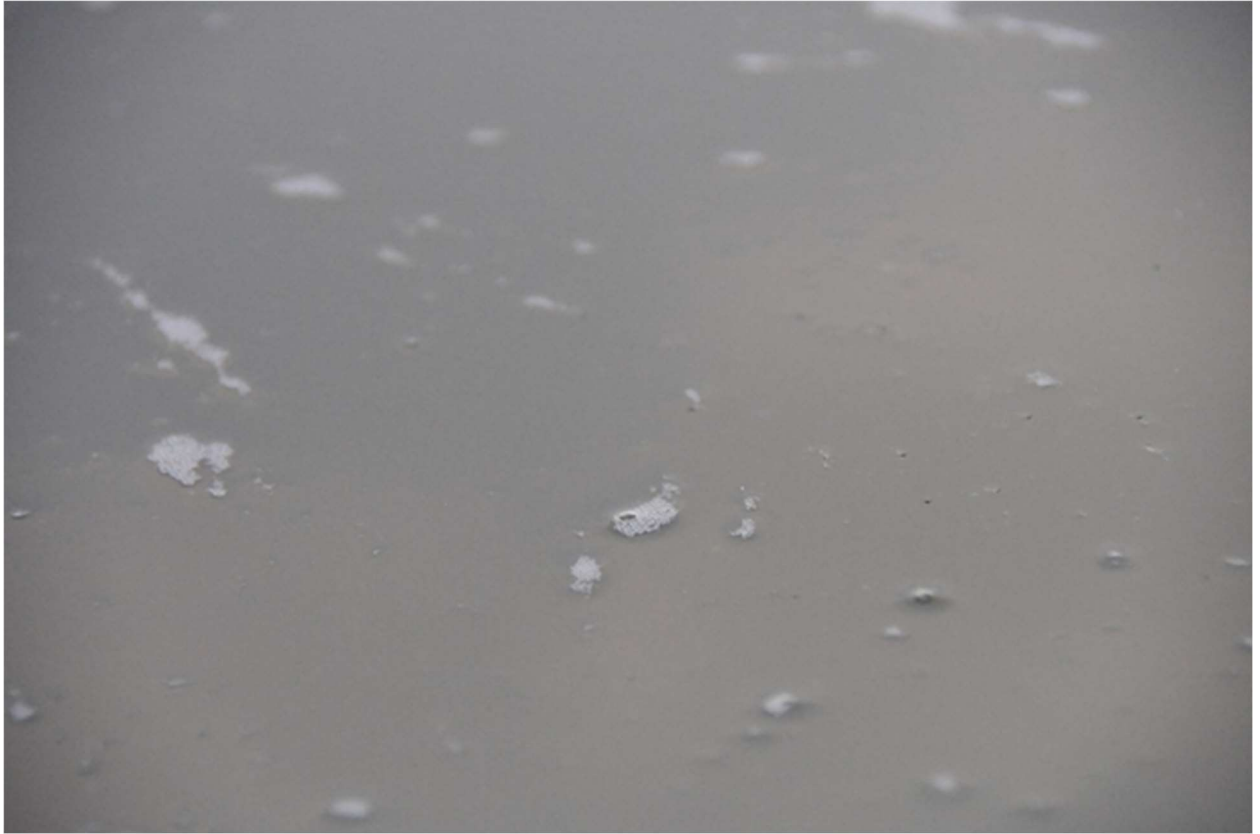

**Figure S7. Ebullition in L. George.** Picture showing stable bubbles trapped in the organic-rich surface waters of L. George a day of calm weather (28/01/18, sampling at noon).
